# Supplementary material
Source: PubMed Central journal article supplement (PMC4253145)
Supplement: Supp_Table1.pdf [file Supp_Table1.pdf]

## Supplementary Material

SUPPLEMENTARY TABLE S1. MAIN TOPOLOGICAL PARAMETERS ASSESSED IN THE PRESENT STUDY

| <i>Parameter</i>              | <i>Definition</i>                                                                                                                                                                                            |
|-------------------------------|--------------------------------------------------------------------------------------------------------------------------------------------------------------------------------------------------------------|
| Number of nodes               | Total number of molecules involved                                                                                                                                                                           |
| Number of edges               | Total number of interactions found                                                                                                                                                                           |
| Clustering coefficient        | Calculated as $CI = 2nI/kI(kI-1)$ , where $nI$ is the number of links connecting the $kI$ neighbors of node $I$ to each other. It is a measure of how the nodes tend to form clusters.                       |
| Connected component           | Subgraph constituted by nodes connected by edges.                                                                                                                                                            |
| Network diameter              | Longest of all the calculated shortest paths in a network.                                                                                                                                                   |
| Network radius                | Minimum among the non-zero eccentricities of the nodes in the network.                                                                                                                                       |
| Network centralization        | Parameter related to the centralization. Networks whose topologies resemble a star have a centralization close to 1, whereas decentralized networks are characterized by having a centralization close to 0. |
| Shortest paths                | Percentage of shortest path on total paths in the network.                                                                                                                                                   |
| Characteristic path length    | Expected distance between two connected nodes.                                                                                                                                                               |
| Averaged number of neighbours | Mean number of connections of each node.                                                                                                                                                                     |
| <u>Network density</u>        | Ratio of the number of edges ( $E$ ) to the number of possible edges given by the binomial coefficient $\binom{N}{2}$ , giving $D = 2E/N(N-1)$ .                                                             |
| Network heterogeneity         | Coefficient of variation of the connectivity distribution, heterogeneity = $\frac{\sqrt{\text{variance}(k)}}{\text{mean}(k)}$ .                                                                              |
| Isolated nodes                | Number of not connected nodes.                                                                                                                                                                               |
| Connected component           | Number of interaction of each node.                                                                                                                                                                          |
| Node degree                   |                                                                                                                                                                                                              |
| Node degree distribution      | Represents the probability that a selected nodes has $k$ links.                                                                                                                                              |
| $\gamma$                      | Exponent of in- and out-degree equation.                                                                                                                                                                     |
| $r$                           | Pearson correlation coefficient of node degree vs. number of nodes, on logarithmized data.                                                                                                                   |
| $R^2$                         | Coefficient of determination of node degree vs. number of nodes, on logarithmized data.                                                                                                                      |
