# Supplementary material
Source: PubMed Central journal article supplement (PMC4253145)
Supplement: Supp_Table2.pdf [file Supp_Table2.pdf]

SUPPLEMENTARY TABLE S2. ATTRIBUTES CALCULATED FOR EACH NODE, USED IN CLUSTER ANALYSIS\*

| <i>Attribute</i>               | <i>Definition</i>                                                                                                                                                                                                                                                                                                                                                                                                                                                   |
|--------------------------------|---------------------------------------------------------------------------------------------------------------------------------------------------------------------------------------------------------------------------------------------------------------------------------------------------------------------------------------------------------------------------------------------------------------------------------------------------------------------|
| Average shortest path length   | It is the length of a shortest path between $n$ and any other node. If $n$ is an isolated node, its value is zero.                                                                                                                                                                                                                                                                                                                                                  |
| Betweenness centrality         | It is computed as follows:<br>$C_b(n) = \sum_{s \neq n \neq t} (\sigma_{st}(n) / \sigma_{st})$ <p>where <math>s</math> and <math>t</math> are nodes in the network different from <math>n</math>, <math>\sigma_{st}</math> denotes the number of shortest paths from <math>s</math> to <math>t</math>, and <math>\sigma_{st}(n)</math> is the number of shortest paths from <math>s</math> to <math>t</math> that <math>n</math> lies on.</p>                       |
| Closeness centrality           | It ranges between 0 and 1.<br>It is the reciprocal of the average shortest path length and is computed as follows:<br>$C_c(n) = 1 / \text{avg}(L(n, m))$ <p>where <math>L(n, m)</math> is the length of the shortest path between two nodes <math>n</math> and <math>m</math>. The closeness centrality of each node is a number between 0 and 1 and it is a measure of how fast information spreads from a given node to other reachable nodes in the network.</p> |
| Clustering coefficient degree  | See definition of cluster coefficient in Table 2.<br>It is the number of edges of a node.                                                                                                                                                                                                                                                                                                                                                                           |
| Eccentricity                   | It is the maximum non-infinite length of a shortest path between $n$ and another node in the network.                                                                                                                                                                                                                                                                                                                                                               |
| Radiality                      | It is computed by subtracting the average shortest path length of a node $n$ from the diameter of the connected component plus 1. The radiality of each node is divided by the diameter of the connected component and it is a number between 0 and 1.                                                                                                                                                                                                              |
| Stress Topological coefficient | It is the number of shortest paths passing through a node.<br>For a node $n$ with $k_n$ neighbors it is computed as follows:<br>$T_n = \text{avg}(J(n, m)) / k_n$ <p>Where <math>J(n, m)</math> is the number of neighbors shared between the nodes <math>n</math> and <math>m</math>, plus one if there is a direct link between <math>n</math> and <math>m</math>. It is a relative measure for the extent to which a node shares neighbors with other nodes.</p> |
| Neighborhood connectivity      | It is defined as the average connectivity of all neighbors of a node, where the connectivity of a node is the number of its neighbors.                                                                                                                                                                                                                                                                                                                              |

\*With modification from <http://med.bioinf.mpi-inf.mpg.de/netanalyzer/help/2.7/index.html#attributes>.
